# Supplementary material
Source: publisher figshare collection journal article supplement (https://sage.figshare.com/ndownloader/files/13292000)
Supplement: Supplementary file 1 [file 13292000]

# **Supplementary Materials**

## **Instructions**

### **Welcome to The Grid Game**

Now you will learn the instructions to the Grid Game.  
The point of the grid game is to earn as many points as you can.

The rules are simple.  
Click to the following screen to learn the rules.

#### **What is the grid game?**

- The grid game is a game where you gain points by exploring a grid. The grid is a 20 x 20 space made up of buttons you can click.

#### **What is the goal of the game?**

- The purpose of the game is to collect as many points as possible.

#### **How do I collect points?**

- You collect points by clicking on the buttons in the grid. Beneath each button lies a certain number of points. These points will be added to your total score.

#### **Which buttons can I click?**

- You will move around the grid by click buttons that are next to each other. The buttons that are available to click will be illuminated.

#### **Where do I start?**

- You will start at the red square illuminated near the left side of the grid. From there you will proceed according to any adjacent buttons.

When does the game end?

- You will have **about 400** moves to explore the grid. The game ends when you have run out of moves.

**When you run out of moves you must click the arrow to proceed to the next screen.**

Anything else?

- **The buttons consist of values between 8 and 78.** Both the minimum and the maximum exist somewhere on the matrix, and the rest of the buttons fall within that range.

- The button values may vary a bit from click to click. But there is a pattern to the grid.

Do these instructions make sense to you? If you'd like to see the instructions again, click "See Instructions Again." If you'd like to continue on, click the "Continue." You will be asked a few questions about these instructions, then you'll be shown your Game Strategy.
